# Supplementary material for: Thiolate-assisted cation exchange reaction for the synthesis of near-infrared photoluminescent HgxCd1−xTe nanocrystals
Source: Royal Society of Chemistry journal article supplement (doi:10.1039/c2dt31602a), 2012-01-01
Supplement: c2dt31602a.pdf [file c2dt31602a.pdf]

## Thiolate-Assisted Cation Exchange Reaction for the Synthesis of Near-Infrared Photoluminescent $\text{Hg}_x\text{Cd}_{1-x}\text{Te}$ Nanocrystals

Hongzhe Wang, Shiyun Lou, Zhaojun Tang, Weiwei Xu, Hangying Shang, Huaibin Shen, and Lin Song Li\*

Key Laboratory for Special Functional Materials, Henan University, Kaifeng 475004, P. R. China

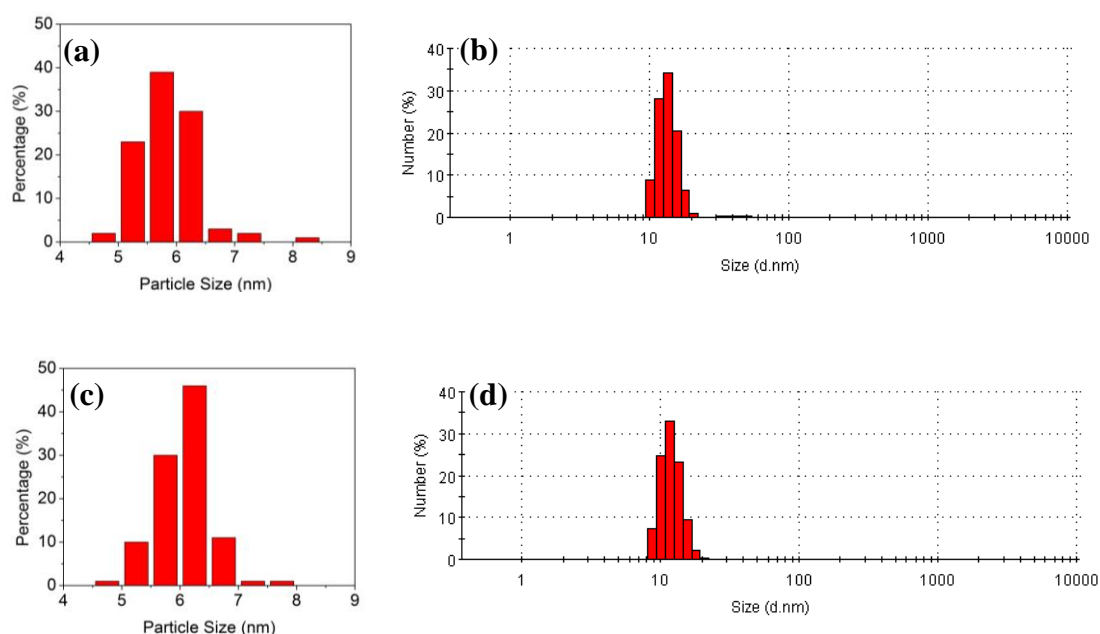

**Figure S1** Particle size distribution histograms of 6 nm sized CdTe NCs obtained from TEM (a) and DSL analysis (b), respectively. And particle size distribution results of corresponding  $\text{Hg}_x\text{Cd}_{1-x}\text{Te}$  NCs based on TEM characterization (c) and DLS result (d). Parameters used for the DLS data analysis: viscosity=0.563 cP, refractive index=1.442. Note that the discrepancy between the DLS and electron microscopy diameters is partly due to polydispersity effects (since DLS is more biased toward larger particles than TEM) and also reflects the swollen dimensions of these microgels in solution (compared to the high-vacuum conditions required for electron microscopy).

---

\* To whom correspondence should be addressed. Fax: +86-378-3881358; Tel: +86-378-3881358; E-mail: lsli@henu.edu.cn.

**Table S1.** Observed interlayer spacing ( $kd$  Å) from the pronounced ( $0k0$ ) reflections of as-synthesized  $\text{Cd}_x\text{Hg}_{1-x}\text{Te}$  NCs nanocrystals

| $d_{obs}$ (Å) | $k$ | $kd$ (Å) |
|---------------|-----|----------|
| 11.7777       | 3   | 35.33    |
| 8.7509        | 4   | 35.00    |
| 7.0756        | 5   | 35.38    |
| 5.8626        | 6   | 35.18    |
| 5.0069        | 7   | 35.05    |
| 4.3711        | 8   | 34.97    |
| 3.8804        | 9   | 34.92    |
| 3.4903        | 10  | 34.90    |
| 3.1730        | 11  | 34.90    |
| 2.9099        | 12  | 34.92    |
| 2.6884        | 13  | 34.95    |
| 2.4995        | 14  | 34.99    |
| 2.3248        | 15  | 34.87    |
| 2.1843        | 16  | 34.95    |
| 2.0519        | 17  | 34.88    |
| 1.9435        | 18  | 34.98    |
| 1.8399        | 19  | 34.96    |
| 1.7478        | 20  | 34.96    |
| 1.6599        | 21  | 34.86    |
| 1.5864        | 22  | 34.90    |
| 1.5155        | 23  | 34.86    |
| 1.4557        | 24  | 34.94    |
| 1.3975        | 25  | 34.94    |
| 1.3413        | 26  | 34.87    |
| 1.2935        | 27  | 34.92    |

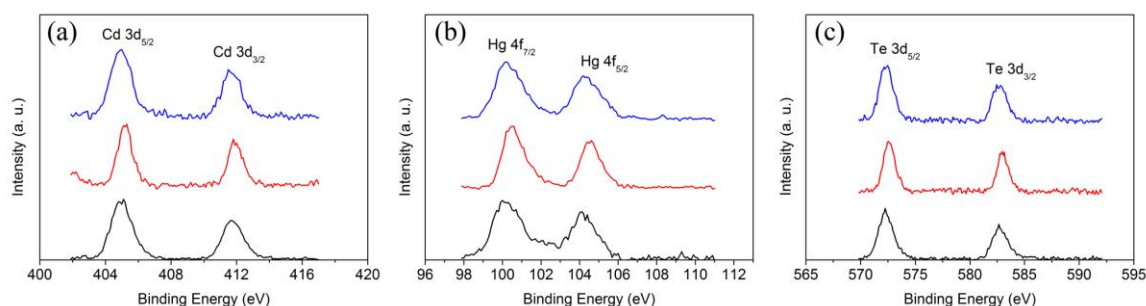

**Figure S2** High-resolution XPS spectra of cadmium 3d (a), mercury 4f (b), and tellurium 3d of  $\text{Hg}_x\text{Cd}_{1-x}\text{Te}$  NCs obtained under different reaction conditions. Black curves (lower), red curves (middle), and blue curves (upper) represent results obtained from same amount of CdTe NCs reacted with 0.02 mL, 0.04 mL, and 0.06 mL of 0.335M Hg (II) ions, respectively.
